## P492

## Estimation of no-flow duration and survival in patients with an initial shockable rhythm after out-of-hospital cardiac arrest

Goto Y.<sup>1</sup>; Funada A.<sup>2</sup>; Maeda T.<sup>1</sup>; Okada F.<sup>1</sup>; Goto Y.<sup>3</sup>

<sup>1</sup>Kanazawa University Hospital, Department of Emergency and Critical Care Medicine, Kanazawa, Japan

<sup>2</sup>Osaka Saiseikai Senri Hospital, Department of Cardiology, Osaka, Japan

<sup>3</sup>Yawata Medical Center, Department of Cardiology, Komatsu, Japan

**Funding Acknowledgements:** Japan Society for the Promotion of Science (KAKENHI Grant No. 18K09999)

**Background:** In patients with unwitnessed out-of-hospital cardiac arrest (OHCA), the actual no-flow duration (the time with no organ perfusion) is unclear. However, when these patients have a shockable rhythm as an initial recorded rhythm, the no-flow duration may be relatively short as compared with other initial rhythms, and some patients can obtain a good functional outcome after OHCA.

**Purpose:** The purpose of the present study was to estimate the no-flow duration and to determine the relationship between no-flow duration and neurologically intact survival in patients with an initial shockable rhythm after OHCA.

**Methods:** We reviewed 82,464 patients with OHCA (aged  $\geq 18$  years, non-traumatic, witnessed, and without any bystander interventions) who were included in the All-Japan Utstein-style registry from 2013 to 2017. The study end point was 1-month neurologically intact survival (Cerebral Performance Category scale 1 or 2). No-flow duration was defined as the time from emergency call to emergency medical services (EMS) arrival at the patient site.

**Results:** The rate of 1-month neurologically intact survival in the patients with an initial shockable rhythm ( $n = 10,384$ , 12.6% of overall patients) was 16.5% (1718/10,384). No-flow duration was significantly and inversely associated with 1-month neurologically intact survival (adjusted odds ratios for 1-minute increments: 0.85, 95% confidence interval: 0.84–0.86). The proportion of patients with a shockable rhythm to the overall patients ( $y$ , %) had a high correlational relationship with no-flow duration ( $x$ , min), depicted by  $y = 21.0 - 0.95 \times x$ ,  $R^2 = 0.935$ . In this analytical model, the number of patients with shockable rhythm reached null at 22 minutes of no-flow duration. The no-flow durations, beyond which the chance for initial shockable rhythm diminished to  $<10\%$ ,  $<5\%$ , and  $<1\%$ , were 12, 13, and 17 minutes, respectively. The rate of neurologically intact survival in the patients with shockable rhythm ( $y$ , %) and no-flow duration ( $x$ , min) were also found to have a strong correlation, depicted by  $y = 0.16 \times x^2 - 5.12 \times x + 45.0$ ,  $R^2 = 0.907$ . The no-flow durations, beyond which the chance for 1-month neurologically intact survival diminished to  $<10\%$ ,  $<5\%$ , and  $<1\%$ , were 10, 11, and 15 minutes, respectively.

**Conclusions:** In OHCA patients without any bystander interventions before EMS personnel arrival, when a shockable rhythm is recorded by EMS personnel as an initial rhythm, the no-flow duration after cardiac arrest is highly likely to be  $<17$  minutes regardless of the layperson witness status. The limitation of no-flow duration to obtain a 1-month neurologically intact survival after OHCA may be 15 minutes when the patients have an initial shockable rhythm.
